# Supplementary material
Source: publisher figshare collection journal article supplement (https://acs.figshare.com/ndownloader/files/4394305)
Supplement: Supplementary file 1 [file 4394305]

# Self-Assembled E<sub>2</sub>L<sub>3</sub> Cryptands (E = P, As, Sb, Bi): Transmetallation, Homo- and Heterometallic Assemblies, and Conformational Isomerism

Virginia M. Cangelosi, Timothy G. Carter, Justin L. Crossland, Lev N. Zakharov,  
Darren W. Johnson\*

Department of Chemistry, Materials Science Institute, and the Oregon Nanoscience and  
Microtechnologies Institute (ONAMI), University of Oregon, Eugene, OR 97403-1253 (USA)

Email: dwj@uoregon.edu

## Supporting Information

### Contents:

|                                                                                                                                                        |     |
|--------------------------------------------------------------------------------------------------------------------------------------------------------|-----|
| CSD Search Details.....                                                                                                                                | S2  |
| Table S1 – CSD refcodes for E-S distances and S-E-S angles .....                                                                                       | S2  |
| Table S2 – DFT and <sup>1</sup> H NMR-calculated energies for homometallic cryptands .....                                                             | S2  |
| Figure S1 – <sup>1</sup> H NMR spectra for homometallic cryptands .....                                                                                | S3  |
| Figure S2 – gCOSY NMR spectra for Sb <sub>2</sub> L <sub>3</sub> .....                                                                                 | S4  |
| Figure S3 – NOESY NMR spectra for Sb <sub>2</sub> L <sub>3</sub> .....                                                                                 | S5  |
| Figure S4 – NOESY NMR spectra for Sb <sub>2</sub> L <sub>3</sub> .....                                                                                 | S6  |
| Figure S5 – NOESY NMR spectra for Sb <sub>2</sub> L <sub>3</sub> .....                                                                                 | S7  |
| Figure S6 – NOESY NMR spectra for Sb <sub>2</sub> L <sub>3</sub> .....                                                                                 | S8  |
| Figure S7 – gCOSY NMR spectra for Bi <sub>2</sub> L <sub>3</sub> .....                                                                                 | S9  |
| Figure S8 – NOESY NMR spectra for Bi <sub>2</sub> L <sub>3</sub> .....                                                                                 | S10 |
| Figure S9 – NOESY NMR spectra for Bi <sub>2</sub> L <sub>3</sub> .....                                                                                 | S11 |
| Figure S10 – Overlaid X-ray and DFT-calculated crystal structures.....                                                                                 | S12 |
| Figure S11 – DFT-calculated structures of E <sub>2</sub> L <sub>3</sub> - <i>asym</i> .....                                                            | S12 |
| Figure S12 – LCMS data for Sb <sub>2</sub> L <sub>3</sub> .....                                                                                        | S13 |
| Figure S13 – ORTEP reps. of X-ray crystal structures of AsSbL <sub>3</sub> , AsBiL <sub>3</sub> , PSbL <sub>3</sub> .....                              | S14 |
| Figure S14 – <sup>31</sup> P NMR of PSbL <sub>3</sub> .....                                                                                            | S14 |
| Figure S15 – Overlaid DFT-calculated structures of Sb <sub>2</sub> L <sub>3</sub> - <i>asym</i> and Bi <sub>2</sub> L <sub>3</sub> - <i>asym</i> ..... | S15 |
| Figure S16 – LCMS spectrometry data for AsSbL <sub>3</sub> .....                                                                                       | S15 |
| Figure S17 – LCMS spectrometry data for AsBiL <sub>3</sub> .....                                                                                       | S16 |
| Figure S18 – LCMS spectrometry data for PSbL <sub>3</sub> .....                                                                                        | S16 |
| CSD Search Details for P•••π contacts .....                                                                                                            | S2  |
| Table S3 – CSD refcodes for P•••π contacts.....                                                                                                        | S17 |

## Cambridge Structural Database Search for E-S Complexes

Searches were performed using ConQuest version 1.10 with CSD database version 5.29 updates (Jan 2008). The following filters were applied to each search: not disordered, no errors, and no powder structures. The substructures E(SC)<sub>3</sub> were searched for each pnictogen (E = P, As, Sb, Bi) (see structures below). The E atoms were constrained to only 3 bonds. Only structures with three separate ligands were analyzed; macrocyclic structures were discarded due to ring strain. Each E-S bond distance and S-E-S bond angle was measured and the results were averaged.

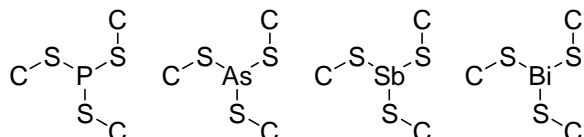

**Table S1.** Refcodes from the Cambridge Structural Database included in the structural survey used to determine average E-S distances and S-E-S angles.

| P        | As       |        | Sb       |        | Bi     |
|----------|----------|--------|----------|--------|--------|
| CUMLIF   | ASMTBZ02 | DEDLUT | CIBKAZ   | XIHNIL | OKOSAI |
| DOYXAQ   | ASXANT   | IBAYAM | CIBKAZ01 | XIHNIL | YUKRUR |
| ETCBPS   | ASXANT01 | JACMUW | CIDWIV   | YUSFUN | ZAHDUH |
| JUFROR   | BOZFIF   | JACNAD | CUYKIQ   | ZAZYII | ZUMSAB |
| SEJRUU   | BOZFIF01 | NEJRAW | SQNLSB10 | ZAZYOO | ZUMSAB |
| SEJRUU01 | BOZFIF02 | QIFKIZ | TIDGOC   |        | ZUMSAB |
| SEJRUU02 | BOZFIF02 | QIFLAS | TIDHAP   |        | ZUMSAB |
| TCBMPH   | CATJOW   | ULICAT | TIDHAP   |        | ZUMSEF |
| TCBMPH   | CUBVIE   | ZAHDIV | XAVYEV   |        | ZUMSEF |

**Table S2.** Energies derived from DFT-calculations and <sup>1</sup>H NMR experiments for symmetric and asymmetric E<sub>2</sub>L<sub>3</sub> cryptands.

| Cryptand                       | DFT Calculations            |                              |                             | <sup>1</sup> H NMR Experiments |                        |          |                          |
|--------------------------------|-----------------------------|------------------------------|-----------------------------|--------------------------------|------------------------|----------|--------------------------|
|                                | Energy symmetric (kcal/mol) | Energy asymmetric (kcal/mol) | Energy dif. (ΔG) (kcal/mol) | Equivalents symmetric          | Equivalents asymmetric | Ratio    | Calculated ΔG (kcal/mol) |
| P <sub>2</sub> L <sub>3</sub>  | -2799891.361                | -2799884.752                 | -6.6083                     | 1                              | 0                      | NA       | NA                       |
| As <sub>2</sub> L <sub>3</sub> | -2379204.541                | -2379199.236                 | -5.30559                    | 60                             | 3                      | 0.5      | 0.148588                 |
| Sb <sub>2</sub> L <sub>3</sub> | -2378314.07                 | -2378310.028                 | -4.04242                    | 0.53                           | 0.47                   | 0.886792 | 0.005959                 |
| Bi <sub>2</sub> L <sub>3</sub> | -2378372.83                 | -2378368.762                 | -4.06814                    | 2                              | 3                      | 1.5      | -0.02011                 |

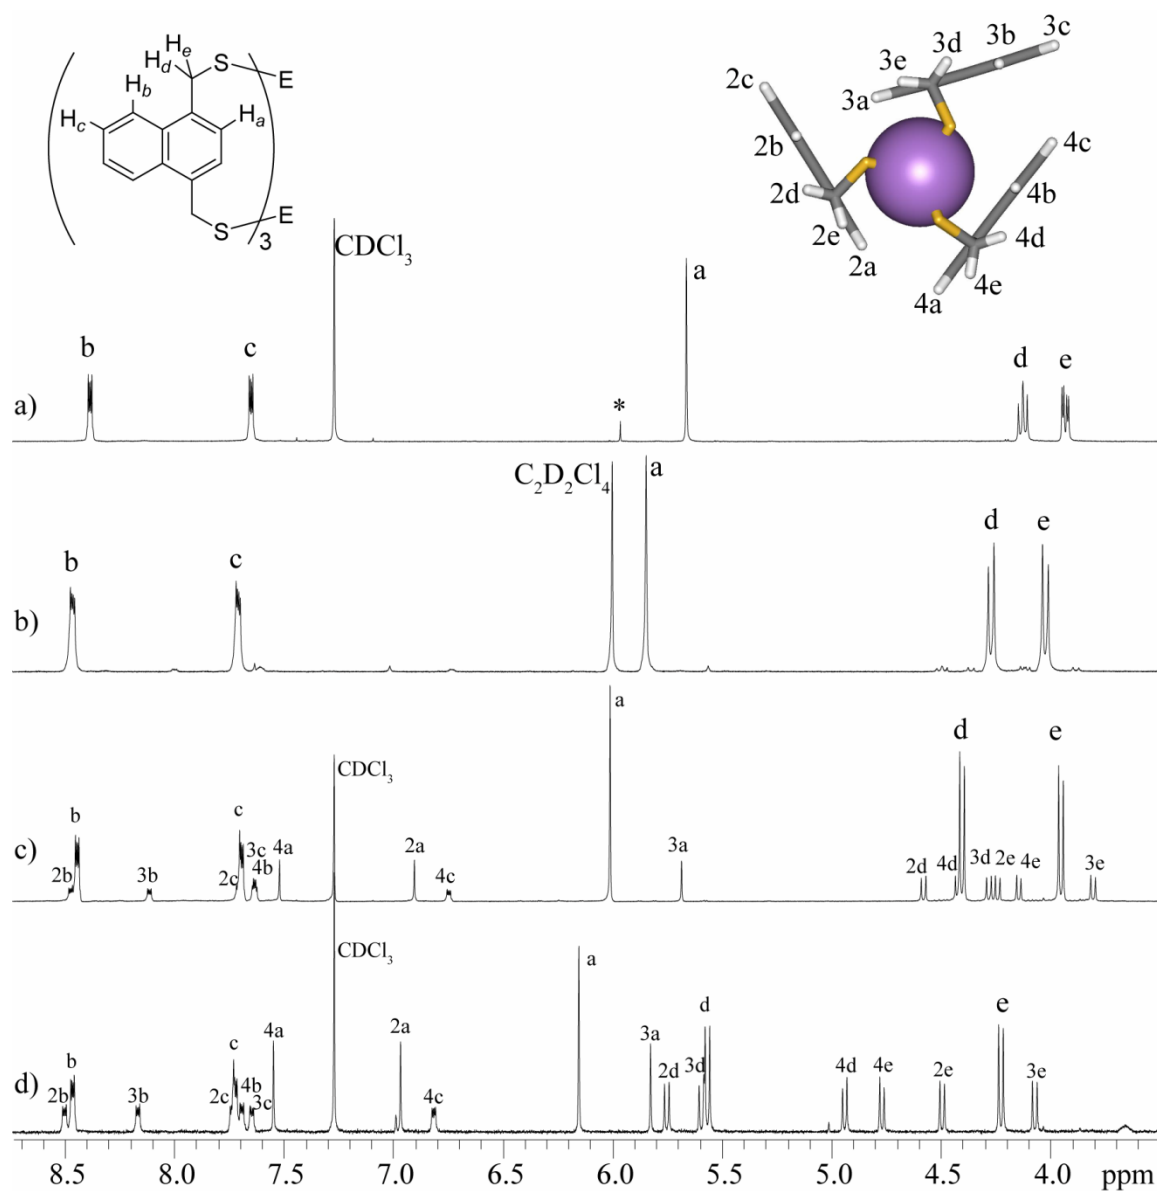

**Figure S1.** Fully labeled  $^1\text{H}$  NMR spectra for (a)  $\text{P}_2\text{L}_3$ , (b)  $\text{As}_2\text{L}_3$ , (c)  $\text{Sb}_2\text{L}_3$  and (d)  $\text{Bi}_2\text{L}_3$ . The resonances for the symmetric cryptand are labeled with just letters. The resonances that correspond to the asymmetric cryptand are labeled with numbers and letters. \* denotes  $\text{C}_2\text{H}_2\text{Cl}_4$  in the spectrum.

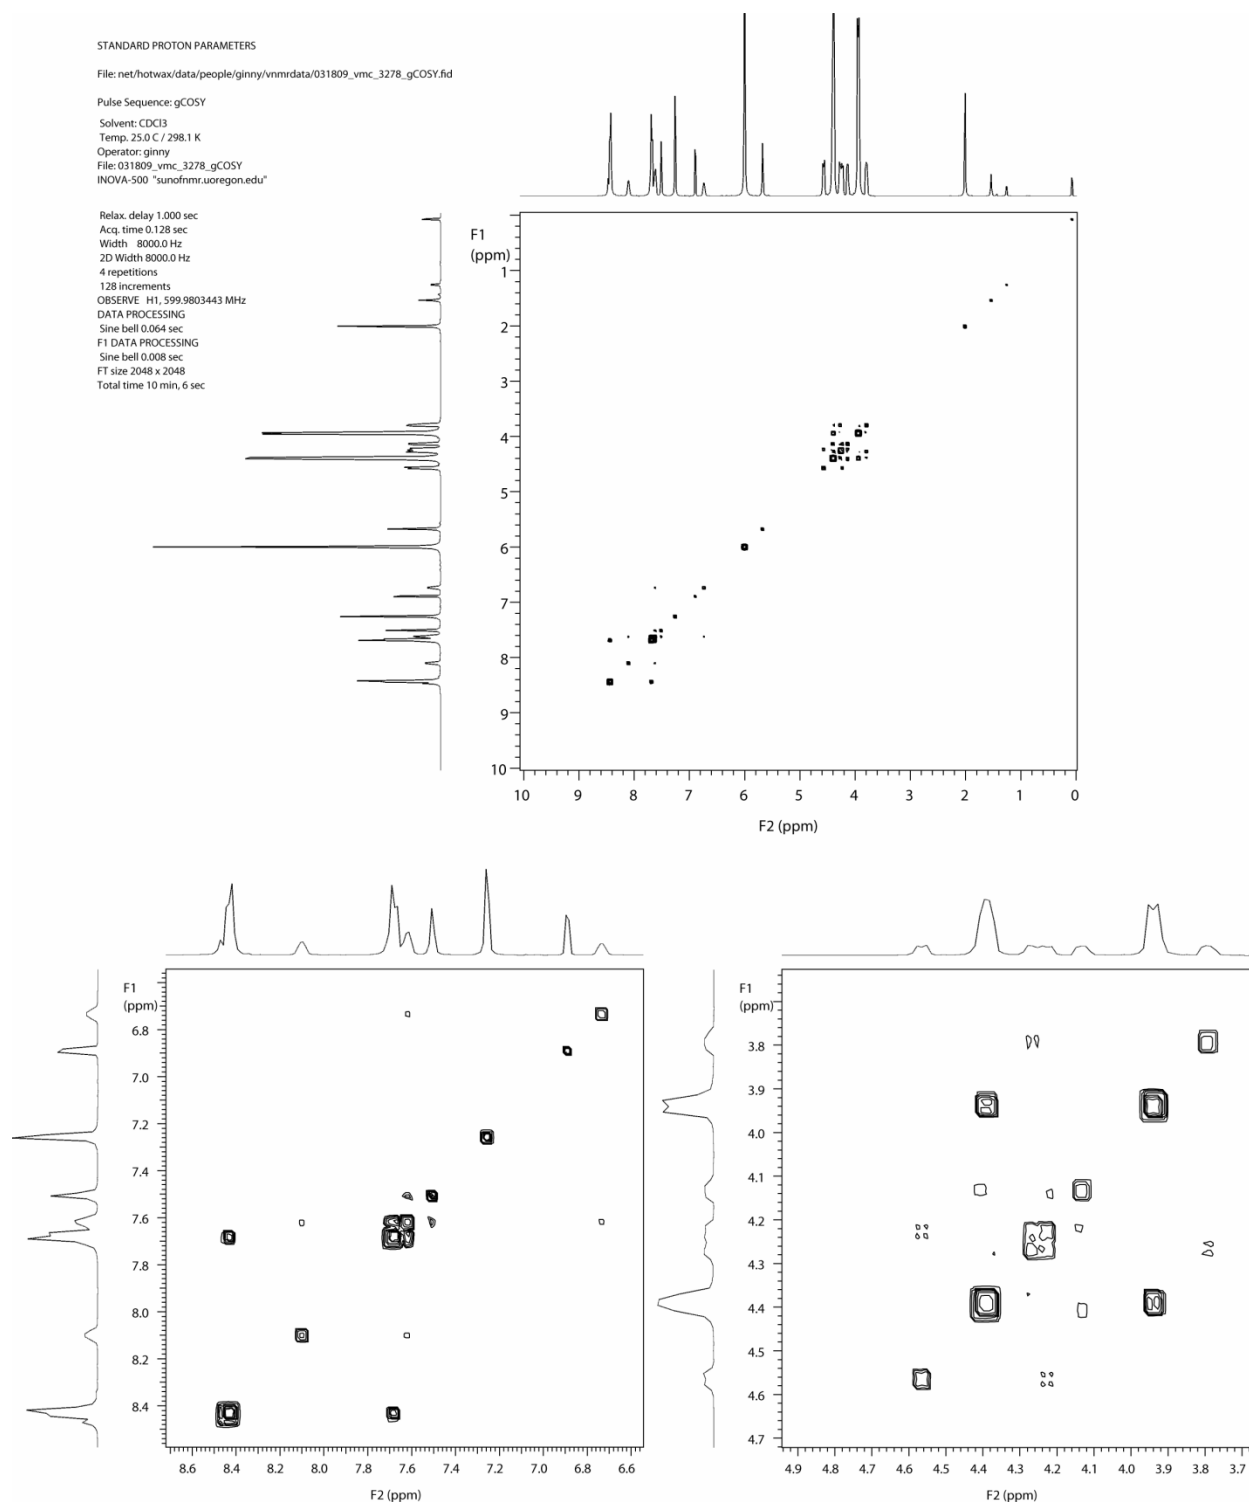

**Figure S2.** gCOSY spectra for  $\text{Sb}_2\text{L}_3$  in  $\text{CDCl}_3$ : full spectrum (top), CH region (bottom left), CH<sub>2</sub> region (bottom right). See Figure S1c for labeling scheme.

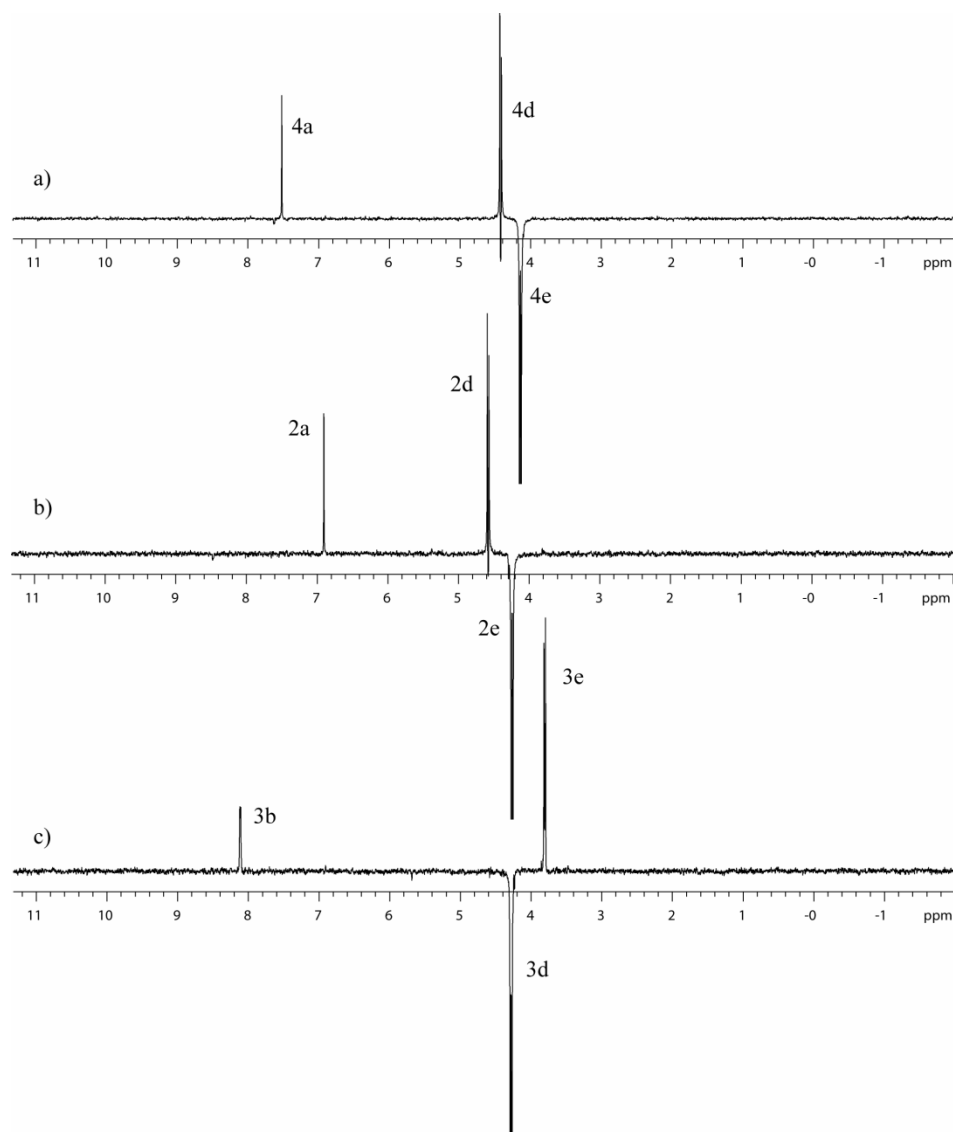

**Figure S3.** 1D NOESY spectra for  $\text{Sb}_2\text{L}_3$  in  $\text{CDCl}_3$  with irradiation of the following protons: (a) 4e, (b) 2e, and (c) 3d. See Figure S1c for labeling scheme.

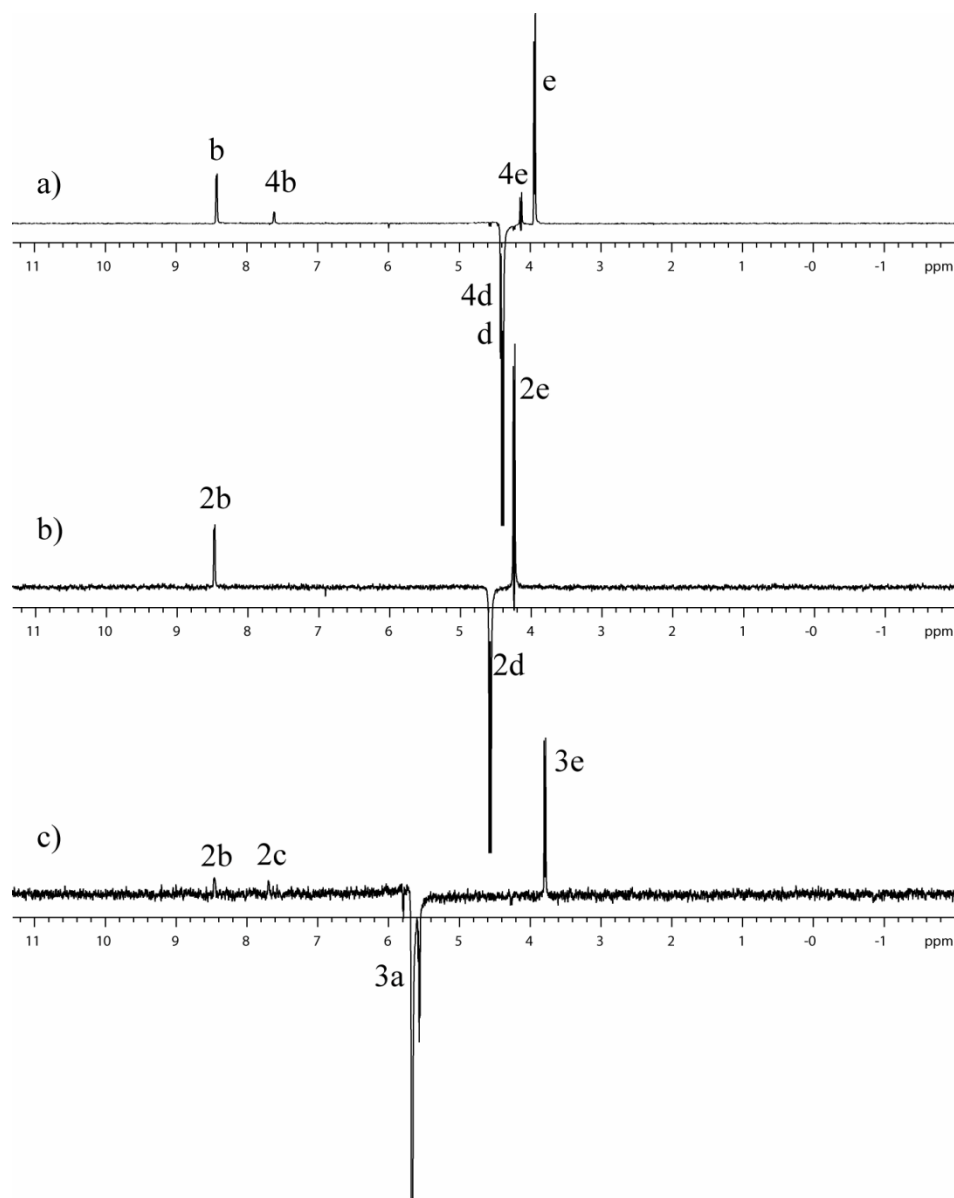

**Figure S4.** 1D NOESY spectra for  $\text{Sb}_2\text{L}_3$  in  $\text{CDCl}_3$  with irradiation of the following protons: (a) d and 4d, (b) 2d, and (c) 3a. See Figure S1c for labeling scheme.

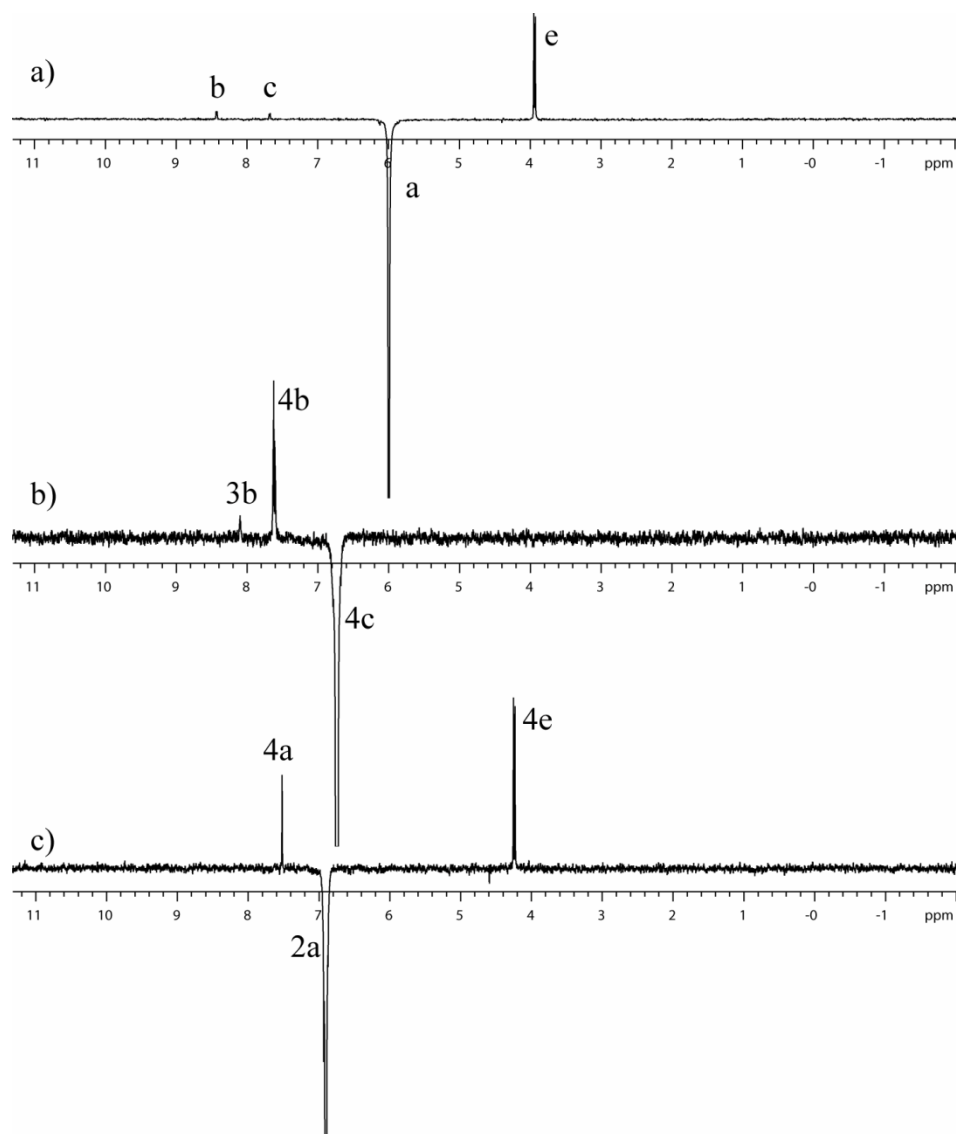

**Figure S5.** 1D NOESY spectra for  $\text{Sb}_2\text{L}_3$  in  $\text{CDCl}_3$  with irradiation of the following protons: (a) a, (b) 4c, and (c) 2a. See Figure S1c for labeling scheme.

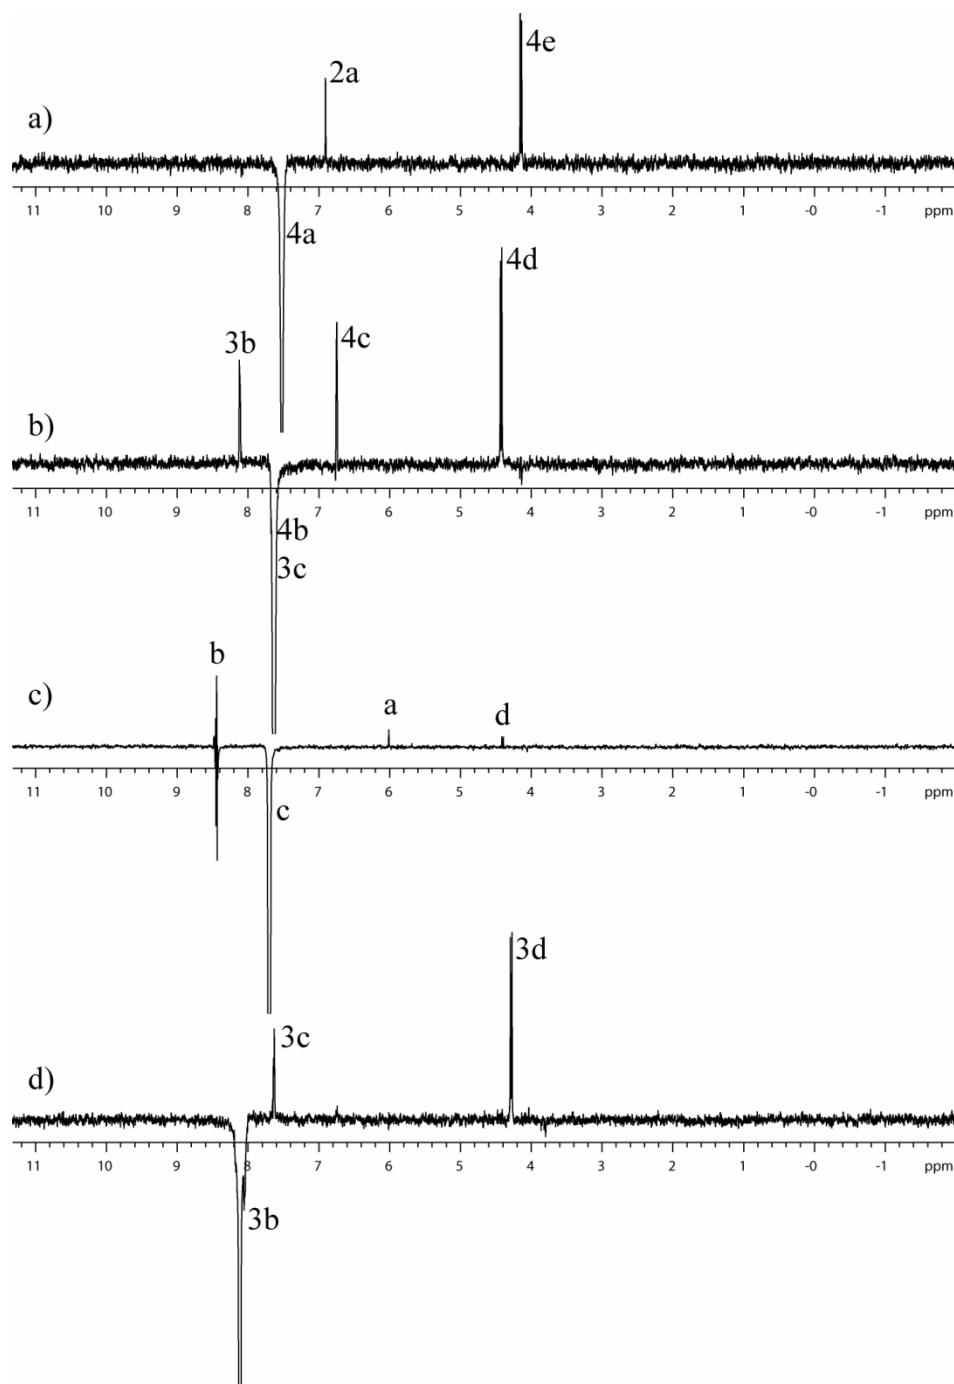

**Figure S6.** 1D NOESY spectra for  $\text{Sb}_2\text{L}_3$  in  $\text{CDCl}_3$  with irradiation of the following protons: (a) 4a, (b) 4b and 3c, (c) c, and (d) 3b. See Figure S1c for labeling scheme.





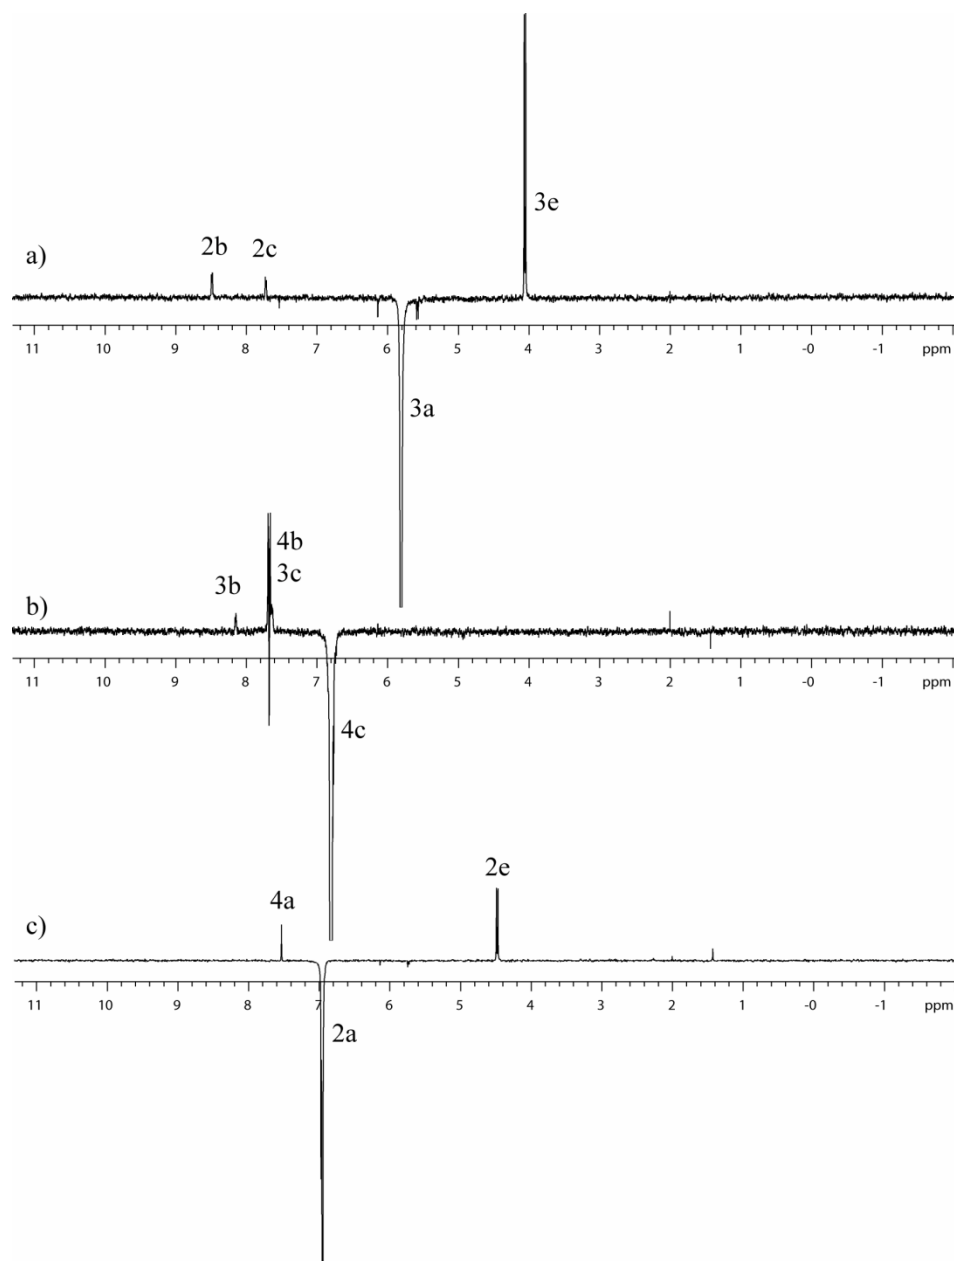

**Figure S8.** 1D NOESY spectra for  $\text{Bi}_2\text{L}_3$  in  $\text{CDCl}_3$  with irradiation of the following protons: (a) 3a, (b) 4c, and (c) 2a. See Figure S1d for labeling scheme.

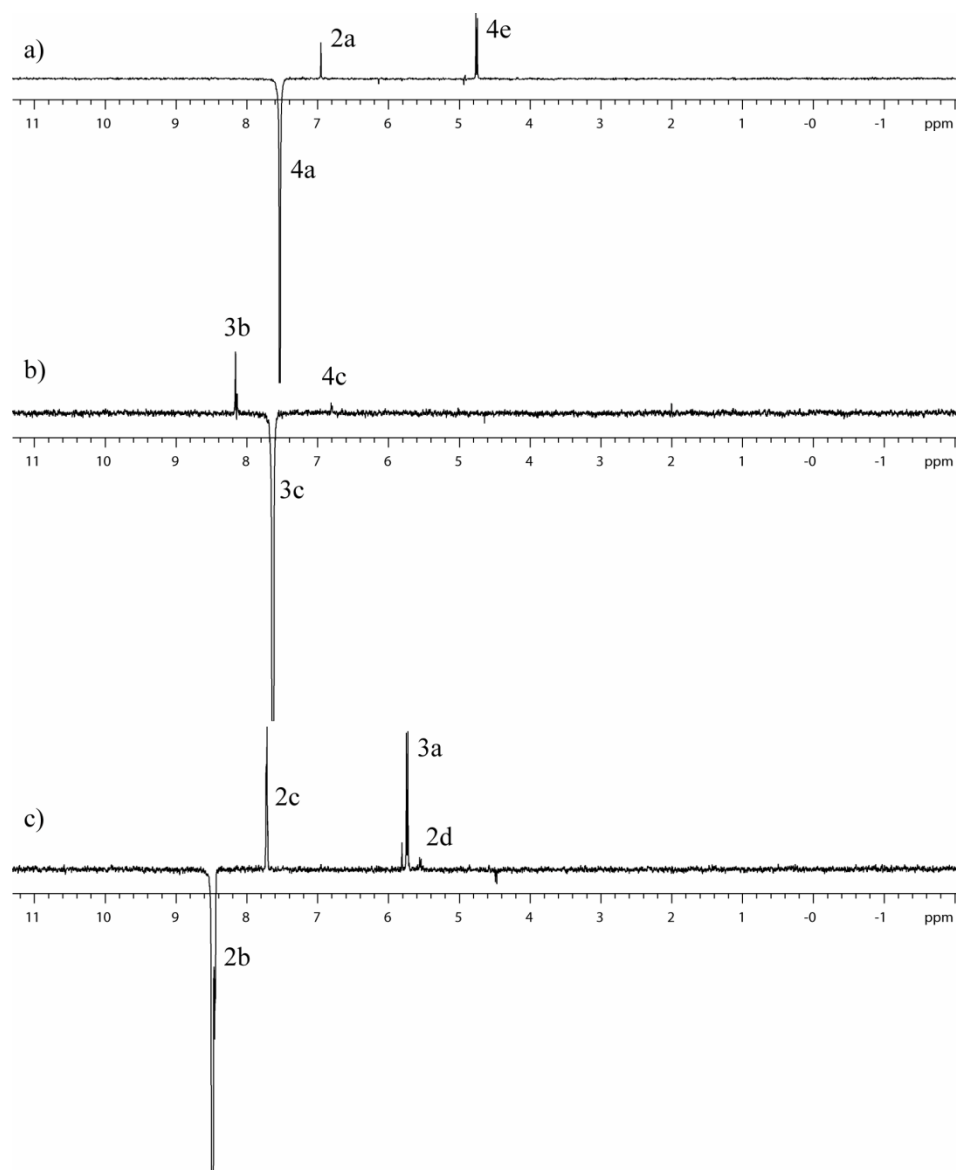

**Figure S9.** 1D NOESY spectra for  $\text{Bi}_2\text{L}_3$  in  $\text{CDCl}_3$  with irradiation of the following protons: (a) 4a, (b) 3c, and (c) 2b. See Figure S1d for labeling scheme.

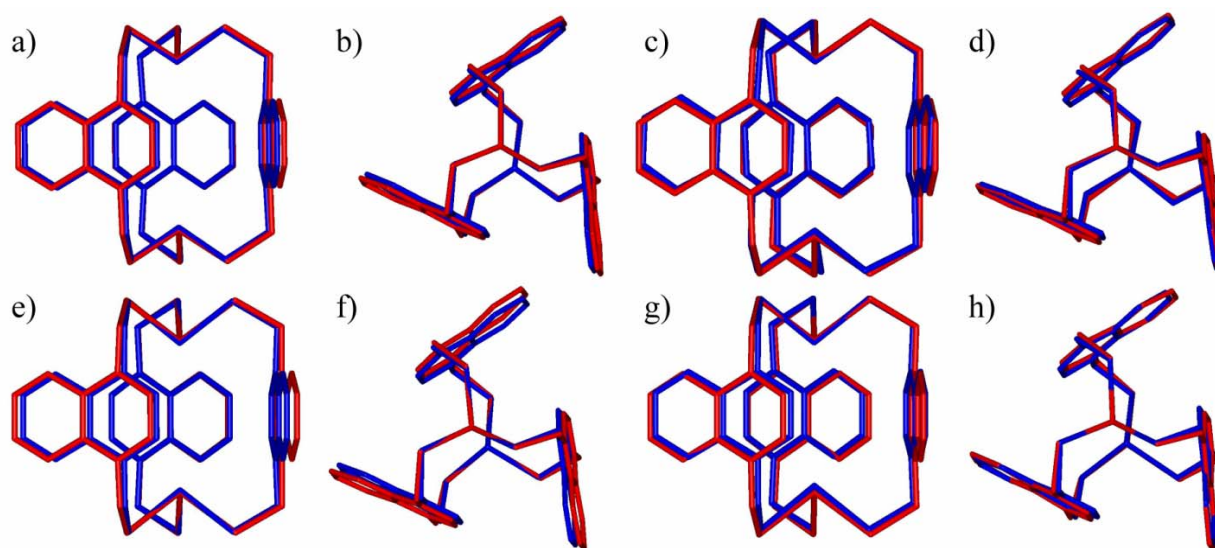

**Figure S10.** Overlaid stick-representations of the X-ray crystal structures (blue) and DFT-calculated structures (red) of (a-b)  $P_2L_3$ , (c-d)  $As_2L_3$ , (e-f)  $Sb_2L_3$  and (g-h)  $Bi_2L_3$ .

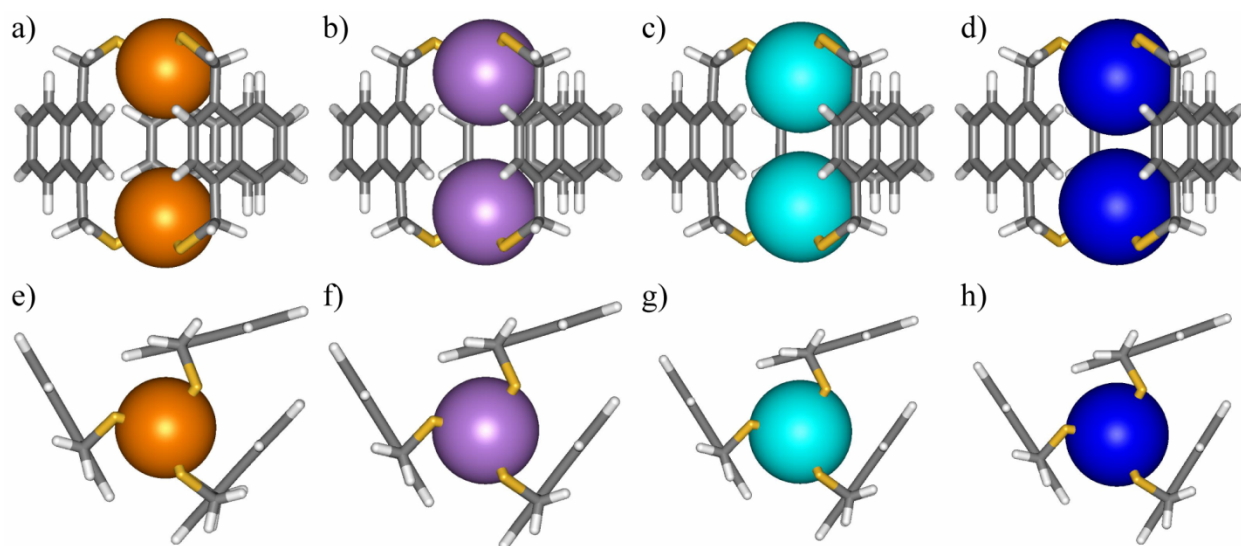

**Figure S11.** DFT-calculated structures of (a, e)  $P_2L_3\text{-}asm$ , (b, f)  $As_2L_3\text{-}asm$ , (c, g)  $Sb_2L_3\text{-}asm$  and (d, h)  $Bi_2L_3\text{-}asm$ .

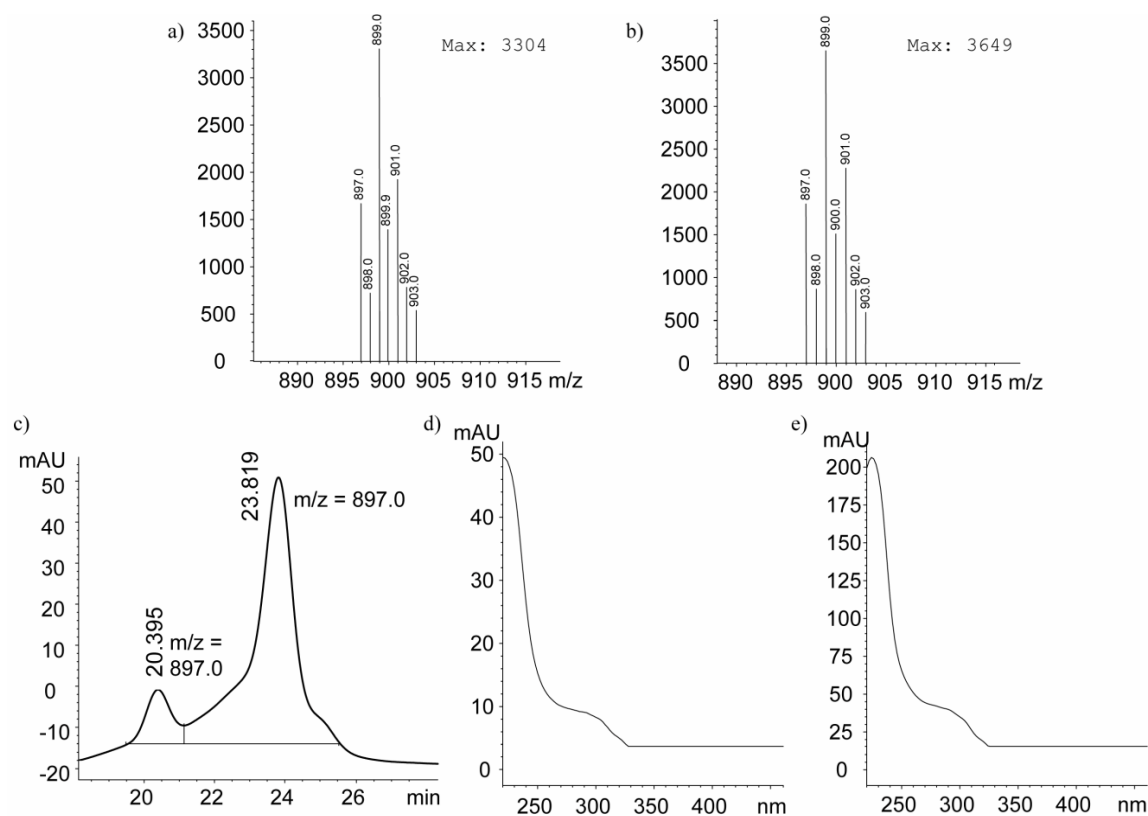

**Figure S12.** Liquid chromatography mass spectrometry data for the two conformers of  $[\text{Sb}_2\text{L}_3+\text{H}]^+$  (a, b). LCMS trace showing two peaks with the same  $m/z$  (c). The isotope distribution verifies that these are both +1 charge states of a  $\text{Sb}_2\text{L}_3$  cryptand. UV/vis spectra for each conformer (d, e).

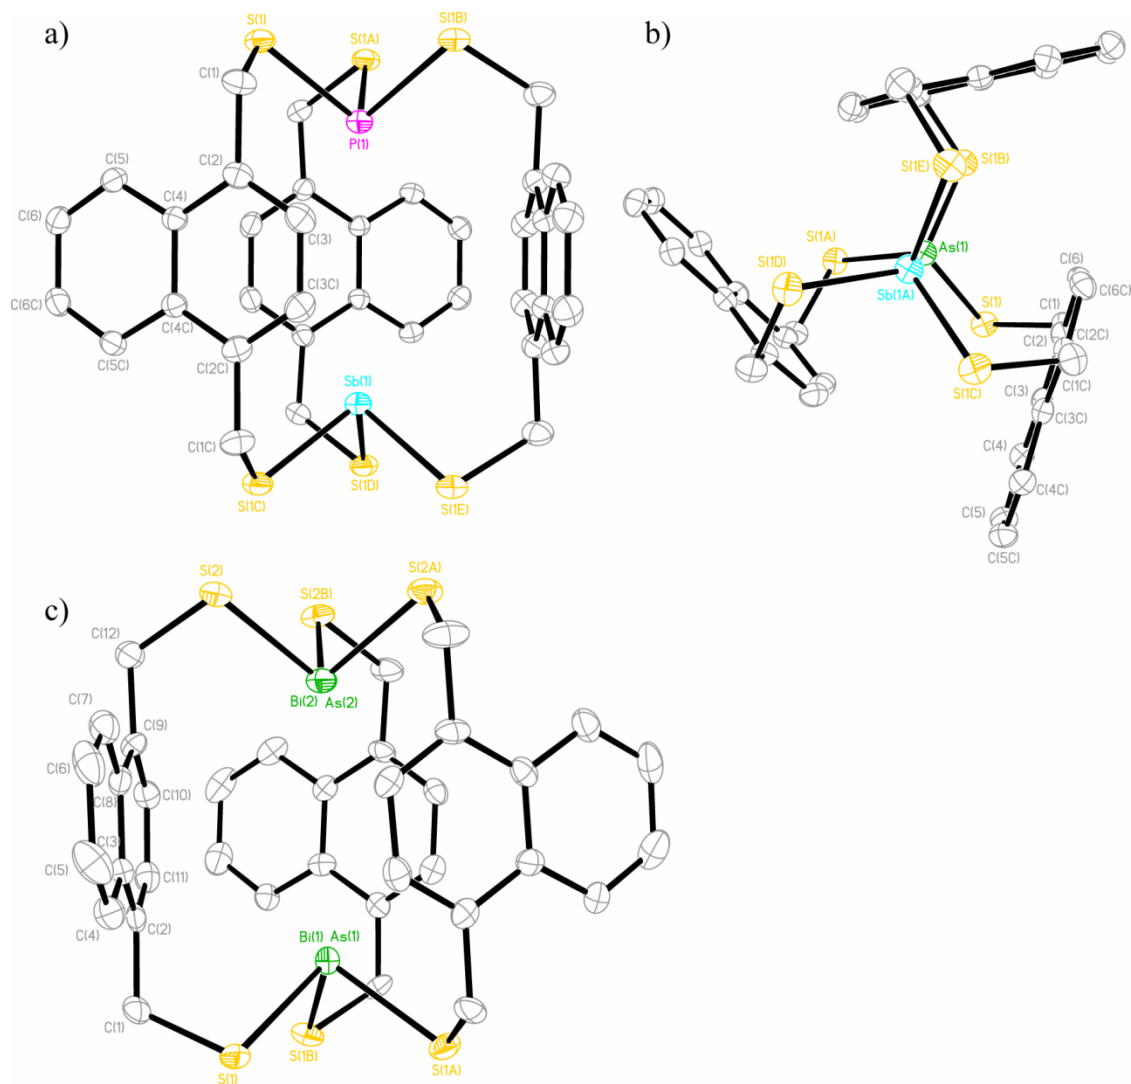

**Figure S13.** ORTEP representations (30% ellipsoids) of the X-ray crystal structures of (a) PSbL<sub>3</sub>, (b) AsSbL<sub>3</sub>, and (c) AsBi<sub>2</sub>L<sub>3</sub>.

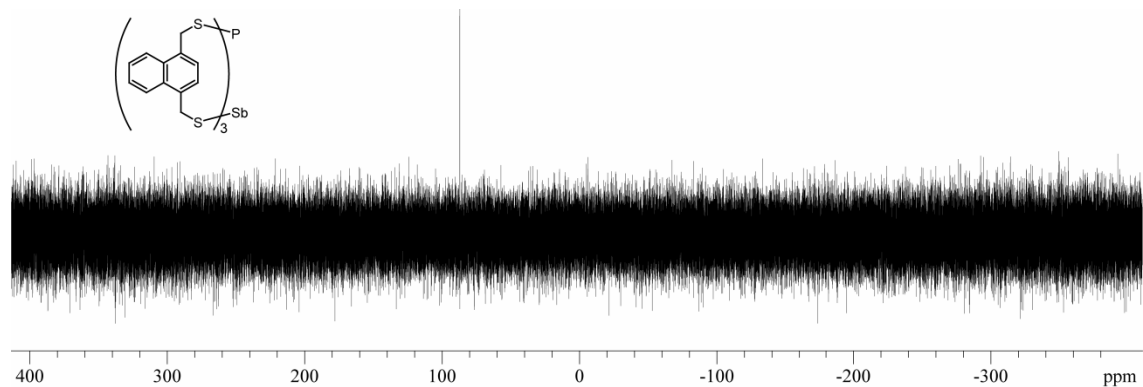

**Figure S14.** <sup>31</sup>P NMR spectrum for PSbL<sub>3</sub>, externally referenced to H<sub>3</sub>PO<sub>4</sub> (0 ppm).

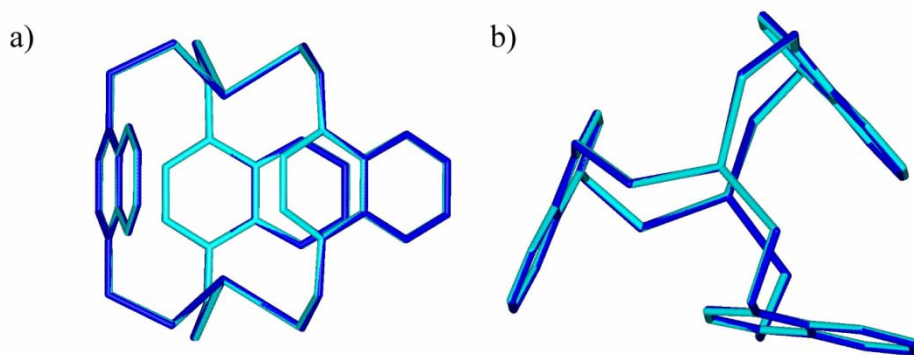

**Figure S15.** Overlaid stick-representations of the DFT-calculated structures of  $\text{Sb}_2\text{L}_3$  (teal) and  $\text{Bi}_2\text{L}_3$  (blue) from (a) side and (b) top.

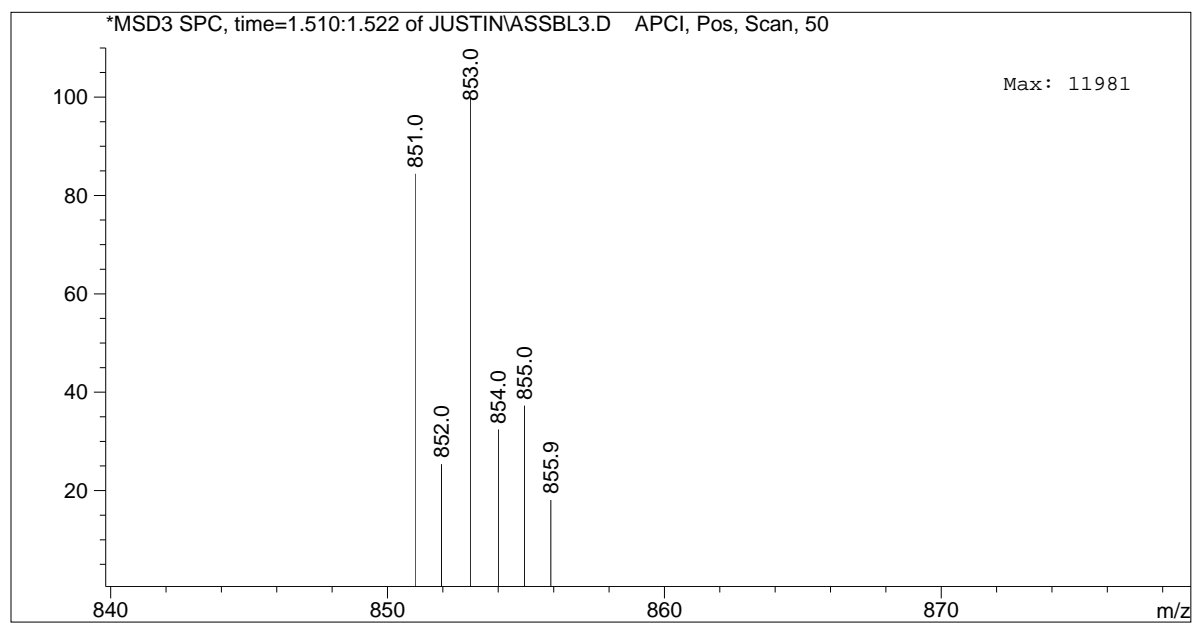

**Figure S16.** LCMS spectrometry data for  $[\text{AsSbL}_3 + \text{H}]^+$ .

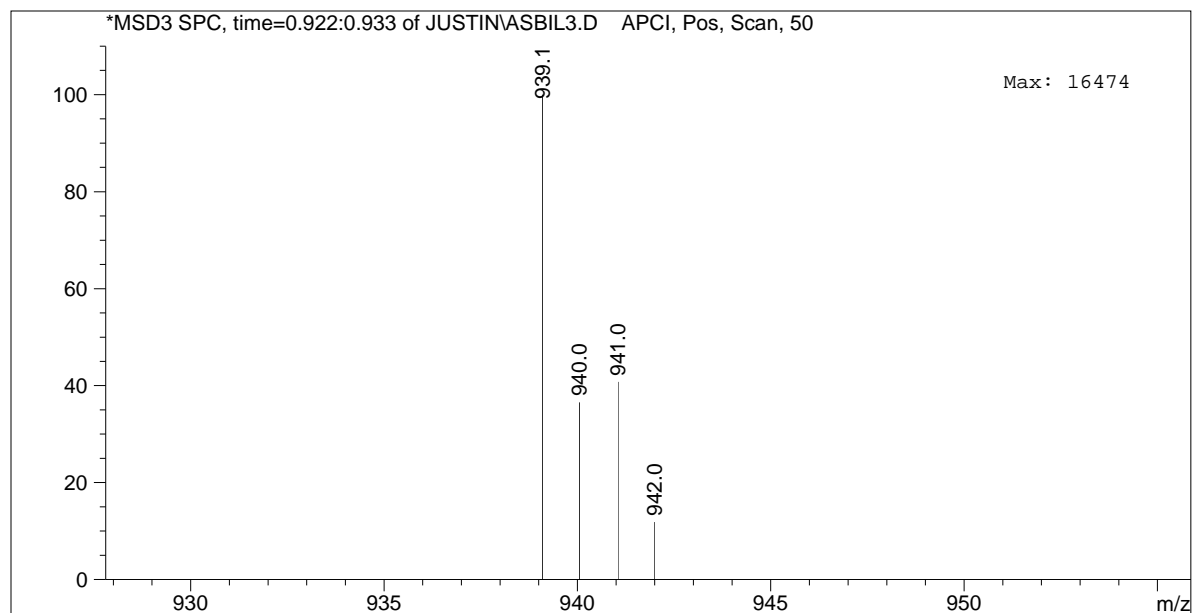

**Figure S17.** LCMS spectrometry data for  $[\text{AsBiL}_3+\text{H}]^+$ .

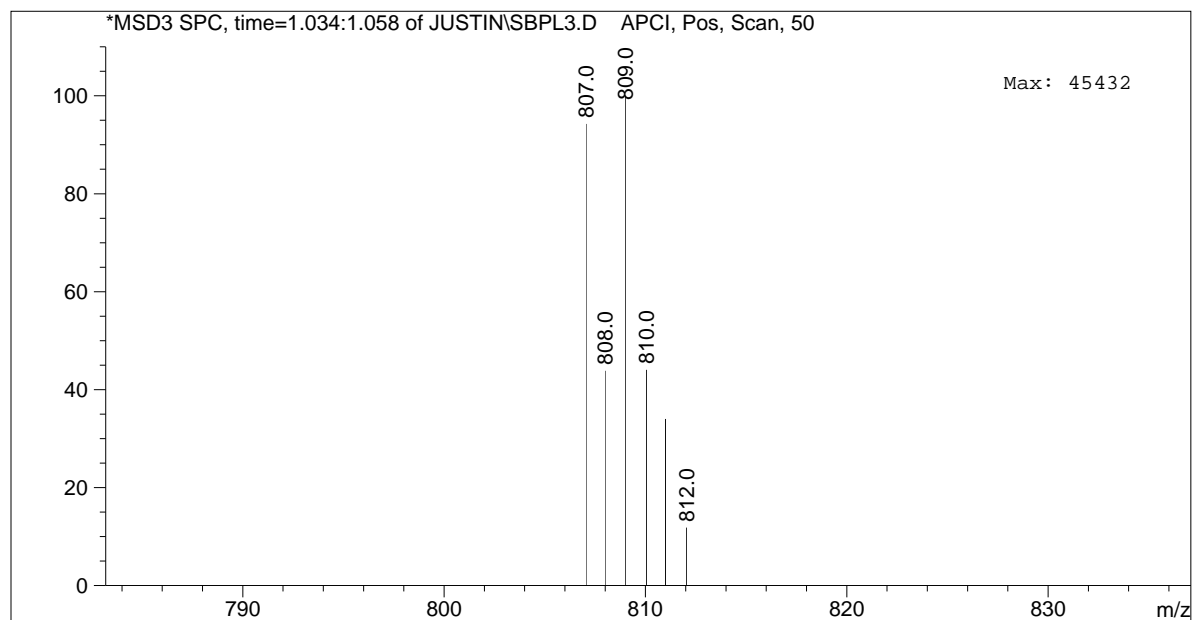

**Figure S18.** LCMS spectrometry data for  $[\text{PSbL}_3+\text{H}]^+$ .



### Cambridge Structural Database Search for P $\cdots$ $\pi$ Contacts

The search was performed using ConQuest version 1.10 with CSD database version 5.29 updates (Jan 2008). The following filters were applied to each search: not disordered, no errors, and no powder structures. The searches screened for C<sub>6</sub>-arene rings and neutral, three-coordinate phosphorus with intermolecular contacts that were shorter than the sum of the van der Waals radii (1.70 Å for aryl C + 1.80 Å for P = 3.50 Å). Structures were excluded if the phosphorus atom was bonded to another phosphorus or metal, charged, or part of a cluster. After excluding one structure, there were 20 hits. No correlation was found between the bond angle and distance.

**Table S3.** Refcodes from the Cambridge Structural Database included in the structural survey.

| Phosphorus |        |        |        |
|------------|--------|--------|--------|
| BAVRIZ     | CEWGIU | IQIMEA | WOPJOA |
| BILVIB     | CIGJOR | JOBFUB | YEQDEE |
| BUFZIL     | FAGLII | NETNEF | ZEWWAZ |
| BUSLEG     | HUMRAI | PAMWIJ | GIHTOH |
| CAYLAP     | ICULIC | WOJMOX | SIHVEL |
